# Supplementary material
Source: Royal Society of Chemistry journal article supplement (doi:10.1039/d6mh00013d)
Supplement: d6mh00013d2.xlsx [file d6mh00013d2.xlsx]

## Sheet: Sheet1
		2% Salt-free RUS			2% RUS-KPO			Water only			40mM KPO
	Time	Mass	Weight loss	Bulk Concentration	Mass	Weight loss	Bulk Concentration	Mass	Weight loss	Bulk Concentration	Mass	Weight loss	Bulk Concentration
	min	mg	% (w/w)	% w/w	mg	% (w/w)	% w/w	mg	% (w/w)	% w/w	mg	% (w/w)	% w/w
	0	4.81	0	2.079	4.77	0	2.09644	4.86	0	N/A	4.68	0	N/A
	1	4.64	3.5343	2.15517	4.56	4.40252	2.19298	4.55	6.3786	N/A	4.4	5.98291	N/A
	2	4.47	7.06861	2.23714	4.36	8.59539	2.29358	4.25	12.5514	N/A	4.18	10.6838	N/A
	3	4.3	10.6029	2.32558	4.18	12.369	2.39234	3.94	18.93	N/A	3.98	14.9573	N/A
	4	4.13	14.1372	2.42131	3.99	16.3522	2.50627	3.66	24.6914	N/A	3.76	19.6581	N/A
	5	3.96	17.6715	2.52525	3.83	19.7065	2.61097	3.41	29.8354	N/A	3.57	23.7179	N/A
	6	3.79	21.2058	2.63852	3.64	23.6897	2.74725	3.17	34.7737	N/A	3.36	28.2051	N/A
	7	3.63	24.5322	2.75482	3.47	27.2537	2.88184	2.94	39.5062	N/A	3.17	32.265	N/A
	8	3.46	28.0665	2.89017	3.29	31.0272	3.03951	2.71	44.2387	N/A	2.97	36.5385	N/A
	9	3.3	31.3929	3.0303	3.11	34.8008	3.21543	2.49	48.7654	N/A	2.78	40.5983	N/A
	10	3.13	34.9272	3.19489	2.93	38.5744	3.41297	2.27	53.2922	N/A	2.58	44.8718	N/A
	11	2.96	38.4615	3.37838	2.75	42.348	3.63636	2.06	57.6132	N/A	2.4	48.7179	N/A
	12	2.82	41.3721	3.5461	2.59	45.7023	3.861	1.86	61.7284	N/A	2.21	52.7778	N/A
	13	2.65	44.9064	3.77358	2.41	49.4759	4.14938	1.66	65.8436	N/A	2.03	56.6239	N/A
	14	2.5	48.0249	4	2.24	53.0398	4.46429	1.43	70.5761	N/A	1.84	60.6838	N/A
	15	2.34	51.3513	4.2735	2.08	56.3941	4.80769	1.22	74.8971	N/A	1.67	64.3162	N/A
	16	2.18	54.6778	4.58716	1.91	59.9581	5.2356	1	79.4239	N/A	1.53	67.3077	N/A
	17	2.03	57.7963	4.92611	1.74	63.522	5.74713	0.8	83.5391	N/A	1.26	73.0769	N/A
	18	1.88	60.9148	5.31915	1.59	66.6667	6.28931	0.59	87.8601	N/A	1	78.6325	N/A
	19	1.73	64.0333	5.78035	1.42	70.2306	7.04225	0.3	93.8272	N/A	0.77	83.547	N/A
	20	1.59	66.9439	6.28931	1.27	73.3753	7.87402	0.16	96.7078	N/A	0.53	88.6752	N/A
	21	1.45	69.8545	6.89655	1.11	76.7296	9.00901	0	100	N/A	0.3	93.5897	N/A
	22	1.31	72.7651	7.63359	0.96	79.8742	10.4167	0	100	N/A	0.09	98.0769	N/A
	23	1.18	75.4678	8.47458	0.82	82.8092	12.1951	0	100	N/A	0	100	N/A
	24	1.06	77.9626	9.43396	0.67	85.9539	14.9254	0	100	N/A	0	100	N/A
	25	0.94	80.4574	10.6383	0.54	88.6792	18.5185	0	100	N/A	0	100	N/A
	26	0.84	82.5364	11.9048	0.41	91.4046	24.3902	0	100	N/A	0	100	N/A
	27	0.74	84.6154	13.5135	0.28	94.13	35.7143	0	100	N/A	0	100	N/A
	28	0.64	86.6944	15.625	0.18	96.2264	55.5556	0	100	N/A	0	100	N/A
	29	0.55	88.5655	18.1818	0.13	97.2746	76.9231	0	100	N/A	0	100	N/A
	30	0.47	90.2287	21.2766	0.12	97.4843	83.3333	0	100	N/A	0	100	N/A
	31	0.39	91.8919	25.641	0.11	97.6939	90.9091	0	100	N/A	0	100	N/A
	32	0.32	93.3472	31.25	0.11	97.6939	90.9091	0	100	N/A	0	100	N/A
	33	0.25	94.8025	40	0.11	97.6939	90.9091	0	100	N/A	0	100	N/A
	34	0.19	96.0499	52.6316	0.11	97.6939	90.9091	0	100	N/A	0	100	N/A
	35	0.15	96.8815	66.6667	0.1	97.9036	100	0	100	N/A	0	100	N/A
	36	0.14	97.0894	71.4286	0.1	97.9036	100	0	100	N/A	0	100	N/A
	37	0.13	97.2973	76.9231	0.1	97.9036	100	0	100	N/A	0	100	N/A
	38	0.13	97.2973	76.9231	0.1	97.9036	100	0	100	N/A	0	100	N/A
	39	0.12	97.5052	83.3333	0.1	97.9036	100	0	100	N/A	0	100	N/A
	40	0.11	97.7131	90.9091	0.1	97.9036	100	0	100	N/A	0	100	N/A
	41	0.11	97.7131	90.9091	0.1	97.9036	100	0	100	N/A	0	100	N/A
	42	0.1	97.921	100	0.1	97.9036	100	0	100	N/A	0	100	N/A
	43	0.1	97.921	100	0.1	97.9036	100	0	100	N/A	0	100	N/A
	44	0.1	97.921	100	0.1	97.4555	100	0	100	N/A	0	100	N/A
	45	0.1	97.921	100	0.1	97.4555	100	0	100	N/A	0	100	N/A
	46	0.1	97.921	100	0.1	97.4555	100	0	100	N/A	0	100	N/A
	47	0.1	97.921	100	0.1	97.4555	100	0	100	N/A	0	100	N/A
	48	0.1	97.921	100	0.1	97.9036	100	0	100	N/A	0	100	N/A
	49	0.1	97.921	100	0.1	97.9036	100	0	100	N/A	0	100	N/A
	50	0.1	97.921	100	0.1	97.4555	100	0	100	N/A	0	100	N/A
